# Supplementary material for: Characterization of microbial biofilms on marine plastics: community development and density implications for vertical transport dynamics
Source: Frontiers journal article supplement (doi:10.3389/fmars.2025.1581727), 2025-05-20
Supplement: Data_Sheet_2.pdf [file Data_Sheet_2.pdf]

## Supplemental Figure 4: Genomics Data

Interactive Krona plots of the genomics data (including raw data) are available at the following repository:

<https://github.com/bochdansky/plastic-biofilm-genomics>

To visualize the individual Krona plots, click on one of the three folders (Bacteria, Eukarya or Fungi). Then click on “view interactive plots”, and finally on the individual link.

Alternative use these direct links:

<https://bochdansky.github.io/plastic-biofilm-genomics/16S%20Bacteria/FullTaxa.krona.html>

<https://bochdansky.github.io/plastic-biofilm-genomics/18S%20Eukarya/FullTaxa.krona.html>

<https://bochdansky.github.io/plastic-biofilm-genomics/ITS%20Fungi/FullTaxa.krona.html>

The Krona plots are organized sequentially with the following labels:

01GL1: one day into the time series

12GL3: 12 days into the time series

21GL1: 21 days into the time series

31GL3: 31 days into the time series

42GL2: 42 days into the time series

We will create a link to this repository and a Digital Object Identifier (DOI) through the Biological and Chemical Oceanography Data Management Office to link the data with the resulting publications.
